# Supplementary material for: Overshoot of the Respiratory Exchange Ratio during Recovery from Maximal Exercise Testing in Young Patients with Congenital Heart Disease
Source: MDPI journal article supplement (doi:10.3390/children10030521), 2023-03-07
Supplement: s1 [file s1]

**Supplementary Table S1.** Pairwise comparisons between four CHD groups and controls.

| <b>HR peak (bpm)</b> | <b>p</b> |
|----------------------|----------|
| Fon vs ToF           | 0.052    |
| Fon vs TGA           | 0.001    |
| Fon vs controls      | 0.000    |
| Fon vs CoA           | 0.000    |
| ToF vs TGA           | 0.170    |
| ToF vs controls      | 0.027    |
| ToF vs CoA           | 0.021    |
| TGA vs controls      | 0.427    |
| TGA vs CoA           | 0.365    |
| controls vs CoA      | 0.904    |

| <b>HR peak (%)</b> | <b>p</b> |
|--------------------|----------|
| Fon vs ToF         | 0.105    |
| Fon vs TGA         | 0.002    |
| Fon vs controls    | 0.000    |
| Fon vs CoA         | 0.000    |
| ToF vs TGA         | 0.115    |
| ToF vs controls    | 0.029    |
| ToF vs CoA         | 0.026    |
| TGA vs controls    | 0.569    |
| TGA vs CoA         | 0.532    |
| controls vs CoA    | 0.951    |

| <b>HRRec 1 ( - bpm)</b> | <b>p</b> |
|-------------------------|----------|
| controls vs CoA         | 0.374    |
| controls vs TGA         | 0.094    |
| controls vs ToF         | 0.059    |
| controls vs Fon         | 0.000    |
| CoA vs TGA              | 0.431    |
| CoA vs ToF              | 0.323    |
| CoA vs Fon              | 0.001    |
| TGA vs ToF              | 0.850    |
| TGA vs Fon              | 0.017    |
| ToF vs Fon              | 0.026    |

| <b>SpO<sub>2</sub> peak (%)</b> | <b>p</b> |
|---------------------------------|----------|
| Fon vs ToF                      | 0.034    |
| Fon vs TGA                      | 0.000    |
| Fon vs CoA                      | 0.000    |
| Fon vs controls                 | 0.000    |
| ToF vs TGA                      | 0.153    |
| ToF vs CoA                      | 0.033    |
| ToF vs controls                 | 0.000    |
| TGA vs CoA                      | 0.484    |
| TGA vs controls                 | 0.002    |
| CoA vs controls                 | 0.017    |

| <b>O<sub>2</sub> pulse (mL/bpm)</b> | <b>p</b> |
|-------------------------------------|----------|
| Fon vs ToF                          | 0.449    |
| Fon vs CoA                          | 0.070    |
| Fon vs controls                     | 0.011    |
| Fon vs TGA                          | 0.001    |
| ToF vs CoA                          | 0.280    |
| ToF vs controls                     | 0.068    |
| ToF vs TGA                          | 0.009    |
| CoA vs controls                     | 0.463    |
| CoA vs TGA                          | 0.126    |
| controls vs TGA                     | 0.412    |

| <b>O<sub>2</sub> pulse (%)</b> | <b>p</b> |
|--------------------------------|----------|
| Fon vs ToF                     | 0.133    |
| Fon vs TGA                     | 0.024    |
| Fon vs CoA                     | 0.016    |
| Fon vs controls                | 0.000    |
| ToF vs TGA                     | 0.426    |
| ToF vs CoA                     | 0.348    |
| ToF vs controls                | 0.022    |
| TGA vs CoA                     | 0.894    |
| TGA vs controls                | 0.144    |
| CoA vs controls                | 0.179    |

| <b>DBP peak (mmHg)</b> | <b>p</b> |
|------------------------|----------|
| controls vs CoA        | 0.052    |
| controls vs Fon        | 0.020    |
| controls vs TGA        | 0.004    |
| controls vs ToF        | 0.001    |
| CoA vs Fon             | 0.675    |
| CoA vs TGA             | 0.340    |
| CoA vs ToF             | 0.207    |
| Fon vs TGA             | 0.604    |
| Fon vs ToF             | 0.415    |
| TGA vs ToF             | 0.768    |

| <b>HR/VO<sub>2</sub> slope (bpm/ml)</b> | <b>p</b> |
|-----------------------------------------|----------|
| controls vs TGA                         | 0.501    |
| controls vs CoA                         | 0.312    |
| controls vs ToF                         | 0.011    |
| controls vs Fon                         | 0.020    |
| TGA vs CoA                              | 0.747    |
| TGA vs ToF                              | 0.068    |
| TGA vs Fon                              | 0.092    |
| CoA vs ToF                              | 0.128    |
| CoA vs Fon                              | 0.159    |
| ToF vs Fon                              | 0.962    |

| <b>METs</b>     | <b>p</b> |
|-----------------|----------|
| Fon vs ToF      | 0.792    |
| Fon vs TGA      | 0.386    |
| Fon vs CoA      | 0.280    |
| Fon vs controls | 0.005    |
| ToF vs TGA      | 0.535    |
| ToF vs CoA      | 0.402    |
| ToF vs controls | 0.009    |
| TGA vs CoA      | 0.829    |
| TGA vs controls | 0.052    |
| CoA vs controls | 0.084    |

| <b>LVEF</b>     | <b>p</b> |
|-----------------|----------|
| Fon vs ToF      | 0.008    |
| Fon vs TGA      | 0.017    |
| Fon vs controls | -        |
| Fon vs CoA      | 0.001    |
| ToF vs TGA      | 0.806    |
| ToF vs controls | -        |
| ToF vs CoA      | 0.226    |
| TGA vs controls | -        |
| TGA vs CoA      | 0.152    |
| CoA vs controls | -        |

| <b>TAPSE</b>    | <b>p</b> |
|-----------------|----------|
| Fon vs ToF      | 0.754    |
| Fon vs TGA      | 0.678    |
| Fon vs controls | -        |
| Fon vs CoA      | 0.048    |
| ToF vs TGA      | 0.141    |
| ToF vs controls | -        |
| ToF vs CoA      | 0.001    |
| TGA vs controls | -        |
| TGA vs CoA      | 0.000    |
| CoA vs controls | -        |

| <b>RER mag (%)</b> | <b>p</b> |
|--------------------|----------|
| ToF vs Fon         | 0.981    |
| ToF vs TGA         | 0.649    |
| ToF vs CoA         | 0.102    |
| ToF vs controls    | 0.000    |
| Fon vs TGA         | 0.674    |
| Fon vs CoA         | 0.115    |
| Fon vs controls    | 0.001    |
| TGA vs CoA         | 0.244    |
| TGA vs controls    | 0.002    |
| CoA vs controls    | 0.058    |

| <b>VO<sub>2</sub> peak (mL/min/kg)</b> | <b>p</b> |
|----------------------------------------|----------|
| Fon vs ToF                             | 0.133    |
| Fon vs TGA                             | 0.024    |
| Fon vs CoA                             | 0.000    |
| Fon vs controls                        | 0.000    |
| ToF vs TGA                             | 0.427    |
| ToF vs CoA                             | 0.029    |
| ToF vs controls                        | 0.000    |
| TGA vs CoA                             | 0.173    |
| TGA vs controls                        | 0.005    |
| CoA vs controls                        | 0.149    |

| <b>VO<sub>2</sub> peak (%)</b> | <b>p</b> |
|--------------------------------|----------|
| Fon vs TGA                     | 0.245    |
| Fon vs ToF                     | 0.044    |
| Fon vs CoA                     | 0.000    |
| Fon vs controls                | 0.000    |
| TGA vs ToF                     | 0.394    |
| TGA vs CoA                     | 0.003    |
| TGA vs controls                | 0.000    |
| ToF vs CoA                     | 0.032    |
| ToF vs controls                | 0.000    |
| CoA vs controls                | 0.105    |

| <b>VO<sub>2</sub> at RCP (mL/Kg/min)</b> | <b>p</b> |
|------------------------------------------|----------|
| Fon vs ToF                               | 0.144    |
| Fon vs TGA                               | 0.077    |
| Fon vs CoA                               | 0.001    |
| Fon vs controls                          | 0.000    |
| ToF vs TGA                               | 0.771    |
| ToF vs CoA                               | 0.048    |
| ToF vs controls                          | 0.002    |
| TGA vs CoA                               | 0.089    |
| TGA vs controls                          | 0.005    |
| CoA vs controls                          | 0.257    |

HR = heart rate; HRRec 1 = heart rate recovery after one minute; VO<sub>2</sub> = oxygen uptake; DBP = diastolic blood pressure; SpO<sub>2</sub> = peripheral oxygen saturation; RCP = respiratory compensation point; METs = metabolic equivalents of task; LVEF = left ventricular ejection fraction; TAPSE = tricuspid annular plane systolic excursion; RER mag = respiratory exchange ratio magnitude; TGA = transposition of great arteries; Fon = Fontan procedure; CoA = aortic coarctation; ToF = tetralogy of Fallot.
